# Supplementary material
Source: Springer Nature journal article supplement (https://www.springermedizin.de/resource/supplementary/12888_2013_1640_MOESM6_ESM.pdf/9481044)
Supplement: MOESM6 [file 9481044]

**A**Study nameStatistics for each studyOdds ratio and 95% CI

|                             | Odds ratio | Lower limit | Upper limit | p-Value |
|-----------------------------|------------|-------------|-------------|---------|
| Fergusson et al. 1996 [42]  | 1.20       | 0.51        | 2.84        | 0.678   |
| Brook et al. 1998 [28]      | 1.16       | 1.00        | 1.35        | 0.053   |
| Brook et al. 2001 [29]      | 1.48       | 1.09        | 2.01        | 0.012   |
| van Laar et al. 2007 [52]   | 1.18       | 0.71        | 1.97        | 0.525   |
| Degenhardt et al. 2013 [41] | 3.20       | 1.11        | 9.25        | 0.032   |
|                             | 1.28       | 1.06        | 1.54        | 0.010   |

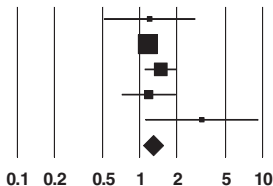

- association + association

**B**Study nameStatistics with study removedOdds ratio (95% CI)  
with study removed

|                             | Point | Lower limit | Upper limit | p-Value |
|-----------------------------|-------|-------------|-------------|---------|
| Fergusson et al. 1996 [42]  | 1.31  | 1.04        | 1.65        | 0.023   |
| Brook et al. 1998 [28]      | 1.44  | 1.13        | 1.84        | 0.003   |
| Brook et al. 2001 [29]      | 1.21  | 0.98        | 1.51        | 0.079   |
| van Laar et al. 2007 [52]   | 1.33  | 1.03        | 1.72        | 0.028   |
| Degenhardt et al. 2013 [41] | 1.21  | 1.07        | 1.38        | 0.003   |
|                             | 1.28  | 1.06        | 1.54        | 0.010   |

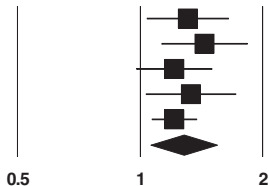

- association + association
